# Supplementary material for: Polyphenolic Composition and Hypotensive Effects of Parastrephia quadrangularis (Meyen) Cabrera in Rat
Source: PubMed Central journal article supplement (PMC6943605; doi:10.3390/antiox8120591), 2019-11-27
Supplement: antioxidants-08-00591-s001.pdf [file antioxidants-08-00591-s001.pdf]

## Supplementary materials

### Methods

#### 1. Phenolic content (TPC) estimation.

The TPC method was based on the Folin–Ciocalteu method. A total of 20  $\mu\text{L}$  of the diluted extract (500  $\mu\text{g}/\text{mL}$ ) were mixed with 100  $\mu\text{L}$  of 10% (vol/vol) of Folin–Ciocalteu reagent and shaken. After 5 mins, 75  $\mu\text{L}$  of  $\text{NaCO}_3$  (700 mM) was added, and absorbance measured at 765 nm using a microplate reader after 1 hour at room temperature. Gallic acid dilutions (0-1000  $\mu\text{g}/\text{mL}$ ) were used as standards for calibration. Data from these multiple experiments were presented as milligram of gallic acid equivalent per gram of dry extract.

#### 2. Total flavonoid content (TFC) estimation.

Briefly, a mixture of 50  $\mu\text{L}$  extracts, 25  $\mu\text{L}$  of aluminum chloride (10%), 80  $\mu\text{L}$  of methanol, and 25  $\mu\text{L}$  of 1 M potassium acetate were placed in a micro-plate, and absorbance read at 510 nm after incubation for 30 min. Analyses were carried out in quadruplicate and the results were expressed as mg quercetin equivalent per gram of dry extract.

#### 3. Ferric reducing antioxidant power (FRAP) assay.

The FRAP reagent composed of 300 mM buffer acetate at pH 3.6, 2,4,6-tris-(2-pyridyl)-s-triazine 10 mM (TPTZ) in hydrochloric acid 40 mM and  $\text{FeCl}_3 \cdot 6\text{H}_2\text{O}$  aqueous solution 20 mM in the ratio of 10:1:1 (v/v). 70  $\mu\text{L}$  FRAP solution was mixed with 10  $\mu\text{L}$  extract solution at 500  $\mu\text{g}/\text{mL}$ , absorbance was read at 593 nm, and compared with 0 - 500  $\mu\text{g}/\text{m}$  trolox solution (standard). Results were presented as mg of trolox/g of dry extract. Experiments were performed in multiples of two.

#### 4. Determination of ABTS radical-scavenging activity

Briefly, a mixture of 2.5 mM  $\text{K}_2\text{S}_2\text{O}_8$ , methanol and ABTS in phosphate buffer saline at pH 7.4 was corrected for absorbance at 734 nm, and kept in the dark at 22°C. A mixture of 180  $\mu\text{L}$  of ABTS in PBS and 20  $\mu\text{L}$  of PBS was used as the blank solution. The radical scavenging properties were measured using Trolox as a standard, calculated as concentration required to scavenge 50% of ABTS radicals, and expressed as  $\text{IC}_{50}$  ( $\mu\text{g}/\text{mL}$ ). Experiments were performed in multiples of two

#### 5. DPPH Radical Scavenging Activity Assay

Briefly, a 0.2 mM solution of 1,1-diphenyl-2-picrylhydrazyl (DPPH) in methanol was prepared, and 70  $\mu\text{L}$  of this solution was added to 20  $\mu\text{L}$  of extract (0-1000  $\mu\text{g}/\text{mL}$ ). Trolox in concentrations of 0-1000  $\mu\text{g}/\text{mL}$  was used as a standard reference antioxidant. Discoloration of the reaction mixture was measured at 517 nm after incubation for 30 min. The results were expressed as  $\text{IC}_{50}$  (concentration of extract or standard in  $\mu\text{g}/\text{mL}$  required to inhibit 50% of DPPH radical present in solution). Analyses were carried out in quadruplicate.

#### 6. Determination of Nitric oxide-scavenging activity

The scavenging effects of extracts on nitric oxide (NO) were carried out by the following method. A total of 40  $\mu\text{L}$  of various concentrations of each positive control or extract dissolved in 50 mM of phosphate buffered saline (PBS; pH 7.4) was added to a 96 well microplate containing 20  $\mu\text{L}$  of sodium nitroprusside (SNP; 25 mM) in PBS. The mixture was incubated at 37 °C for 2 h under normal light exposure. Control set without the test compounds but with 40  $\mu\text{L}$  of PBS was conducted in an identical manner. The mixture was diluted with 50  $\mu\text{L}$  of Griess reagent (0.5% sulphanilamide and 0.05% naphthylethylenediamine dihydrochloride in 2.5%  $\text{H}_3\text{PO}_4$ ) and the absorbance was measured at 570 nm. To evaluate the NO scavenging effect of extract, the NO scavenger ascorbic acid was used as positive control for comparison. The NO-scavenging effect was expressed as an  $\text{IC}_{50}$  value (concentration in  $\mu\text{g}/\text{mL}$  required to inhibit NO formation by 50%), following the construction of a standard curve for sodium nitrate.

#### 7. Phosphomolybdate assay

The antioxidant capacity was evaluated with a quantitative method of phosphomolybdate reagent. Exact 10  $\mu\text{L}$  of the extract (500  $\mu\text{g}/\text{mL}$ ) was mixed with the phosphomolybdenum reagent (100  $\mu\text{L}$ , composed of sulphuric acid 0.6 M, sodium phosphate, 28 mM and ammonium molybdate, 4 mM). The tubes with the mixture were then placed in a dry bath heat blocks at 95 °C for 90 minutes, then cooled and the measurement was performed at 765 nm. Antioxidant activity is expressed as mg of ascorbic acid/gram of extract, following the construction of a standard curve. Analyses were carried out in quadruplicate.

### 8. Reducing power determination

An exact aliquot of 20  $\mu\text{L}$  (500  $\mu\text{g/mL}$ ) of the extracts was mixed with 500  $\mu\text{L}$  of phosphate buffer (0.2 M, pH 6.6) and 500  $\mu\text{L}$  of 1% (w/v) potassium ferricyanide. The mixture was set at 50  $^{\circ}\text{C}$  incubated for 20 min. Adding 500  $\mu\text{L}$  of 10% (w/v) trichloroacetic acid to the mixture stopped the reaction. Mixture was then centrifuged (3,000 rpm) for 10 min. 50  $\mu\text{L}$  of supernatant was then collected, mixed with 10  $\mu\text{L}$  ferric chloride (0.1% w/v at a ratio of 1:1:0.2 v.v.v.v) and 50  $\mu\text{L}$  of distilled water. The concentration of ferric–ferrocyanide was determined at 700 nm using ascorbic acid as standard. Analysis were carried out in quadruplicate.

**Table. S1.** High resolution UHPLC PDA-Q orbitrap identification of metabolites in the hydroalcoholic extract of *Parastrephia quadrangularis* (Pq)

| Peak # | Retention time (min.) | UV max  | Tentative identification                   | Elemental composition [M-H]                                  | Theoretical mass (m/z) | Measured mass (m/z) | Accuracy ( $\delta\text{ppm}$ ) | MS <sup>n</sup> ions ( $\delta\text{ppm}$ )                                                                                                                                              |
|--------|-----------------------|---------|--------------------------------------------|--------------------------------------------------------------|------------------------|---------------------|---------------------------------|------------------------------------------------------------------------------------------------------------------------------------------------------------------------------------------|
| 1      | 1.29                  | -       | Gluconic acid                              | C <sub>6</sub> H <sub>11</sub> O <sub>7</sub> <sup>-</sup>   | 195.05103              | 195.05057           | -18.72                          |                                                                                                                                                                                          |
| 2      | 1.61                  | 305-350 | Esculin (Esculetin-6-O-glucoside)          | C <sub>15</sub> H <sub>15</sub> O <sub>9</sub> <sup>-</sup>  | 339.07216              | 339.07217           | 0.02                            |                                                                                                                                                                                          |
| 3      | 8.76                  | 305-348 | Fraxin (Fraxetin-8-O-glucoside)            | C <sub>16</sub> H <sub>17</sub> O <sub>10</sub> <sup>-</sup> | 369.08272              | 369.08267           | -0.13                           | 161.02377 C <sub>9</sub> H <sub>5</sub> O <sub>3</sub> <sup>-</sup> (umbelliferone)                                                                                                      |
| 4      | 9.17                  | 299-325 | Esculetin-6-O-(2-O'' arabinosyl) glucoside | C <sub>20</sub> H <sub>23</sub> O <sub>13</sub> <sup>-</sup> | 471.11441              | 471.11438           | -0.06                           | 177.01869 C <sub>9</sub> H <sub>5</sub> O <sub>4</sub> <sup>-</sup> (esculetin)                                                                                                          |
| 5      | 9.37                  | 255-325 | Chlorogenic acid                           | C <sub>16</sub> H <sub>17</sub> O <sub>9</sub> <sup>-</sup>  | 353.08781              | 353.08786           | 0.14                            | 191.05556 C <sub>7</sub> H <sub>11</sub> O <sub>6</sub> <sup>-</sup> (quinic acid)                                                                                                       |
| 6      | 9.57                  | 255-325 | Feruloylquinic acid                        | C <sub>17</sub> H <sub>19</sub> O <sub>9</sub> <sup>-</sup>  | 367.10346              | 367.10352           | 0.16                            | 134.03656 C <sub>8</sub> H <sub>6</sub> O <sub>2</sub> <sup>-</sup> (decarboxylated ferulic acid)<br>193.05013 C <sub>10</sub> H <sub>9</sub> O <sub>4</sub> <sup>-</sup> (ferulic acid) |
| 7      | 9.75                  | 255-310 | Ferulic acid                               | C <sub>9</sub> H <sub>5</sub> O <sub>4</sub> <sup>-</sup>    | 177.01933              | 177.01888           | -2.5                            | 133.02879 C <sub>8</sub> H <sub>5</sub> O <sub>2</sub> <sup>-</sup> (decarboxylated ferulic acid)                                                                                        |
| 8      | 9.90                  | 299-345 | Euphorbetin glucoside                      | C <sub>24</sub> H <sub>19</sub> O <sub>13</sub> <sup>-</sup> | 515.08311              | 515.08313           | 0.03                            | 177.01881 C <sub>9</sub> H <sub>5</sub> O <sub>4</sub> <sup>-</sup> (esculetin)                                                                                                          |
| 9      | 10.16                 | 325     | Caffeoyloxytremetone                       | C <sub>22</sub> H <sub>19</sub> O <sub>6</sub> <sup>-</sup>  | 379.11871              | 379.11896           | 0.65                            | 117.03378 C <sub>8</sub> H <sub>5</sub> O <sub>3</sub> <sup>-</sup> ;<br>145.02873 C <sub>9</sub> H <sub>5</sub> O <sub>2</sub> <sup>-</sup>                                             |
| 10     | 10.35                 | 295-345 | Scopoletin (3)                             | C <sub>10</sub> H <sub>7</sub> O <sub>4</sub> <sup>-</sup>   | 191.03498              | 191.03448           | -2.61                           |                                                                                                                                                                                          |

|    |       |         |                                                         |                        |           |           |       |                                                                         |
|----|-------|---------|---------------------------------------------------------|------------------------|-----------|-----------|-------|-------------------------------------------------------------------------|
| 11 | 10.48 | 255-325 | Feruloylquinic acid                                     | $C_{17}H_{19}O_9^-$    | 367.10346 | 367.10361 | 0.40  | 173.04492 $C_7H_9O_5^-$<br>(quinic acid);<br>134.03665 $C_8H_6O_2^-$    |
| 12 | 10.76 | 285-345 | Euphorbetin                                             | $C_{18}H_9O_8^-$       | 353.03046 | 353.03049 | 0.08  |                                                                         |
| 13 | 11.37 | 285-345 | Umbelliferone                                           | $C_9H_5O_3^-$          | 161.02442 | 161.02386 | -3.4  |                                                                         |
| 14 | 11.71 | 255-325 | Dicaffeoylquinic acid                                   | $C_{25}H_{23}O_{12}^-$ | 515.11950 | 515.11932 | 0.34  | 191.05563 $C_7H_{11}O_6^-$<br>(quinic acid);<br>135.04437 $C_8H_7O_2^-$ |
| 15 | 11.90 | 255-325 | Dicaffeoylquinic acid                                   | $C_{25}H_{23}O_{12}^-$ | 515.11950 | 515.11938 | -0.23 | 173.04494 $C_7H_9O_5^-$<br>(shikimic acid);<br>135.04437 $C_8H_7O_2^-$  |
| 16 | 12.63 | 310     | Caffeoyl-feruloylquinic acid                            | $C_{26}H_{25}O_{12}^-$ | 529.13515 | 529.13507 | -0.15 | 173.04503 $C_7H_9O_5^-$<br>(shikimic acid);<br>134.03654 $C_8H_6O_2^-$  |
| 17 | 13.55 | -       | Tricaffeoylquinic acid                                  | $C_{34}H_{29}O_{15}^-$ | 677.15119 | 677.15009 | -1.62 | 173.04495 $C_7H_9O_5^-$<br>(shikimic acid);<br>135.04442 $C_8H_7O_2^-$  |
| 18 | 13.86 | 255-365 | Kaempferol                                              | $C_{34}H_{29}O_{15}^-$ | 285.04046 | 285.04053 | 0.24  | 133.02882 $C_8H_5O_2^-$                                                 |
| 19 | 14.06 | 254-354 | Quercetin                                               | $C_{15}H_9O_7^-$       | 301.03538 | 301.03546 | 0.26  | 107.01305 $C_6H_3O_2^-$ ;<br>151.00296 $C_7H_3O_4^-$                    |
| 20 | 14.78 | 254-354 | Isorhamnetin                                            | $C_{16}H_{11}O_7^-$    | 315.05103 | 315.05112 | 0.28  | 135.04446 $C_8H_7O_2^-$ ;<br>161.02396 $C_9H_5O_3^-$                    |
| 21 | 15.20 | 281     | 5,4'-dihydroxy-7,3'-<br>dimethoxyflavanone ( <b>1</b> ) | $C_{17}H_{15}O_6^-$    | 315.08741 | 315.08151 | -18.7 | 173.04498 $C_7H_9O_5^-$<br>(shikimic acid);<br>135.04425 $C_8H_7O_2^-$  |
| 22 | 16.28 | 218     | Trihydroxyoctadecadienoic<br>acid                       | $C_{18}H_{31}O_5^-$    | 327.21770 | 327.21783 | 0.39  |                                                                         |
| 23 | 17.13 | 256-366 | 7-Methoxykaempferol                                     | $C_{16}H_{11}O_6^-$    | 299.05611 | 299.05624 | 0.43  |                                                                         |
| 24 | 17.83 | 254-354 | 7-Methoxyquercetin                                      | $C_{16}H_{11}O_7^-$    | 315.05103 | 315.05109 | 0.190 |                                                                         |
| 25 | 19.00 | 225     | Trihydroxyoctadecaenoic<br>acid                         | $C_{18}H_{33}O_5^-$    | 329.23335 | 329.23367 | 0.97  |                                                                         |
| 26 | 18.46 | 255-354 | 5-hydroxy-7,4',3'-<br>trimethoxyflavanone ( <b>5</b> )  | $C_{18}H_{15}O_8^-$    | 359.07724 | 359.07745 | 0.58  |                                                                         |
| 27 | 18.99 | 254-354 | 7, 3', 5'-trimethoxymyricetin                           | $C_{18}H_{15}O_8^-$    | 359.07724 | 359.07727 | 0.08  |                                                                         |

|    |       |         |                                                                           |                                                             |           |           |        |                                                                                                                                 |
|----|-------|---------|---------------------------------------------------------------------------|-------------------------------------------------------------|-----------|-----------|--------|---------------------------------------------------------------------------------------------------------------------------------|
| 28 | 19.19 | 283     | 5,3'4'-trihydroxy-7-methoxyflavanone (7-methoxy-eriodictyol) ( <b>2</b> ) | C <sub>16</sub> H <sub>13</sub> O <sub>6</sub> <sup>-</sup> | 301.07176 | 301.07187 | 0.36   | 135.04440 C <sub>8</sub> H <sub>7</sub> O <sub>2</sub> <sup>-</sup>                                                             |
| 29 | 19.41 | 275-325 | Dehidro <i>p</i> -methoxy-coumaric acid                                   | C <sub>10</sub> H <sub>11</sub> O <sub>3</sub> <sup>-</sup> | 179.07137 | 179.07108 | -1.61  | 133.02882 C <sub>8</sub> H <sub>5</sub> O <sub>2</sub> <sup>-</sup>                                                             |
| 30 | 19.69 | 254-354 | 3,5,4'-trihydroxy-7,8,3'-trimethoxyflavone ( <b>6</b> )                   | C <sub>19</sub> H <sub>17</sub> O <sub>8</sub> <sup>-</sup> | 373.09289 | 373.09286 | -0.08  |                                                                                                                                 |
| 31 | 19.84 | 281     | 5,4'-dihydroxy-3,7,8,3'-tetramethoxyflavone ( <b>7</b> )                  | C <sub>18</sub> H <sub>17</sub> O <sub>6</sub> <sup>-</sup> | 329.10306 | 329.10321 | 0.45   |                                                                                                                                 |
| 32 | 20.07 | 254-354 | 7,3,3'-trimethoxyquercetin                                                | C <sub>18</sub> H <sub>15</sub> O <sub>7</sub> <sup>-</sup> | 343.08233 | 343.08258 | 0.72   |                                                                                                                                 |
| 33 | 20.48 | 254-354 | 5, 4'-dihydroxy-3'7, 8-trimethoxyflavone                                  | C <sub>17</sub> H <sub>13</sub> O <sub>8</sub> <sup>-</sup> | 345.09798 | 345.09180 | -17.90 |                                                                                                                                 |
| 34 | 20.79 | 215     | Trihydroxydocosaheptaenoic acid                                           | C <sub>22</sub> H <sub>31</sub> O <sub>5</sub> <sup>-</sup> | 375.21770 | 375.21771 | 0.02   |                                                                                                                                 |
| 35 | 20.89 | 275-310 | <i>p</i> -Coumaroyltremetone ( <b>4</b> )                                 | C <sub>22</sub> H <sub>19</sub> O <sub>5</sub> <sup>-</sup> | 363.12380 | 363.12387 | 0.19   | 117.03374 C <sub>8</sub> H <sub>5</sub> O <sup>-</sup> ;<br>145.02869 C <sub>9</sub> H <sub>5</sub> O <sub>2</sub> <sup>-</sup> |
| 36 | 21.12 | 275-324 | <i>m</i> -Coumaroyoxytremetone                                            | C <sub>22</sub> H <sub>19</sub> O <sub>5</sub> <sup>-</sup> | 363.12380 | 363.12384 | 0.11   | 117.03370 C <sub>8</sub> H <sub>5</sub> O <sup>-</sup> ;<br>145.02867 C <sub>9</sub> H <sub>5</sub> O <sub>2</sub> <sup>-</sup> |
| 37 | 21.47 | 275-324 | Feruloyloxytremetone                                                      | C <sub>23</sub> H <sub>21</sub> O <sub>6</sub> <sup>-</sup> | 393.13436 | 393.13452 | 0.40   | 117.03378 C <sub>8</sub> H <sub>5</sub> O <sup>-</sup> ;<br>145.02873 C <sub>9</sub> H <sub>5</sub> O <sub>2</sub> <sup>-</sup> |

---

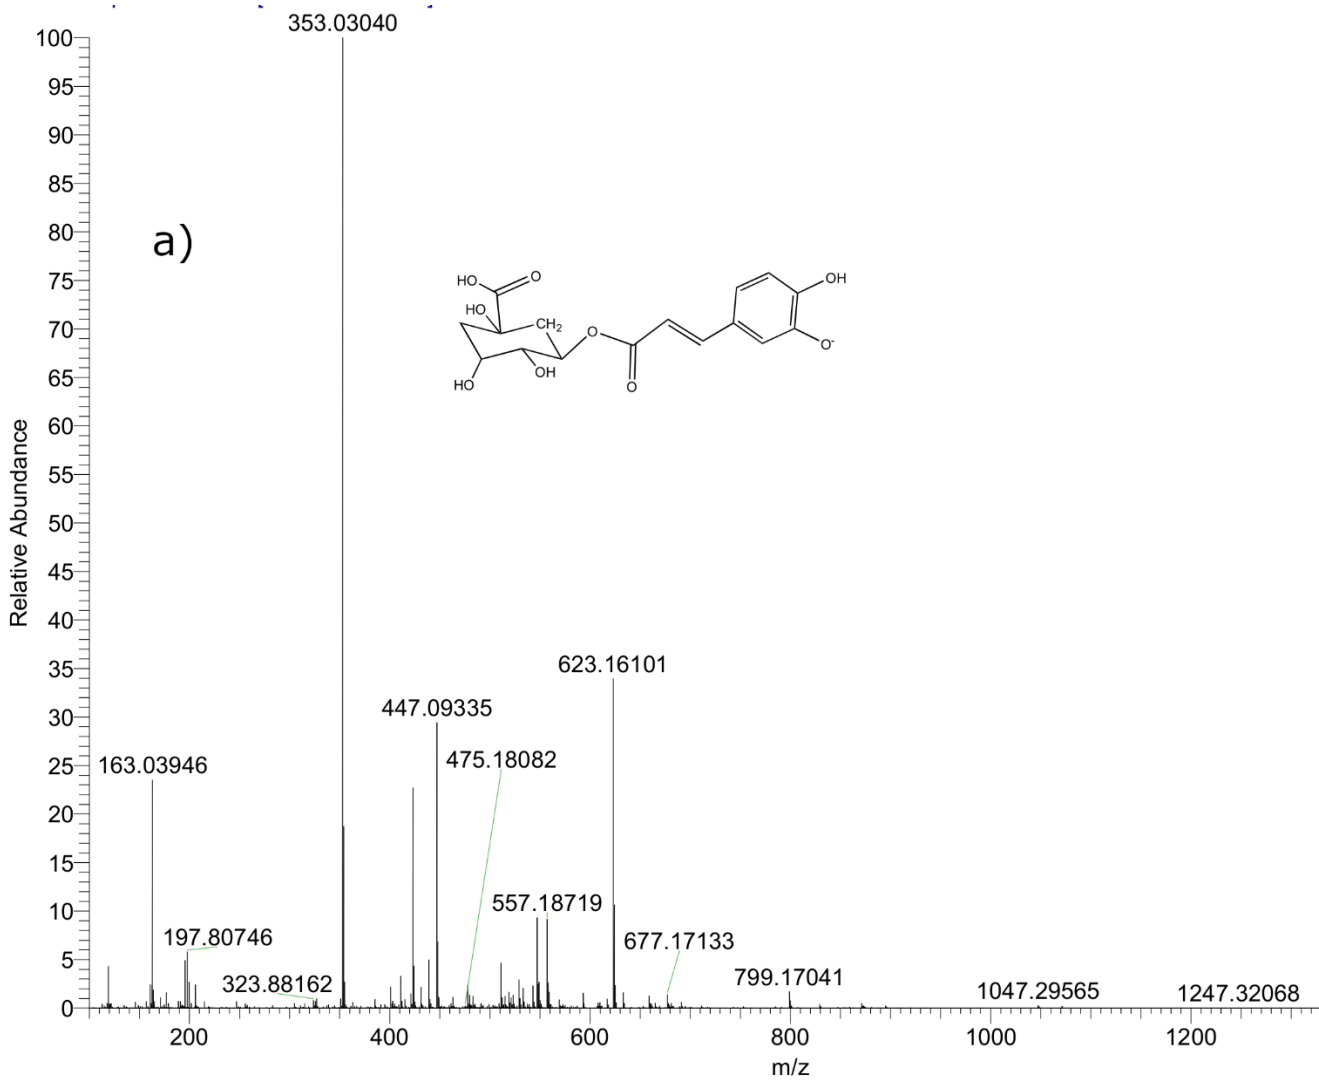

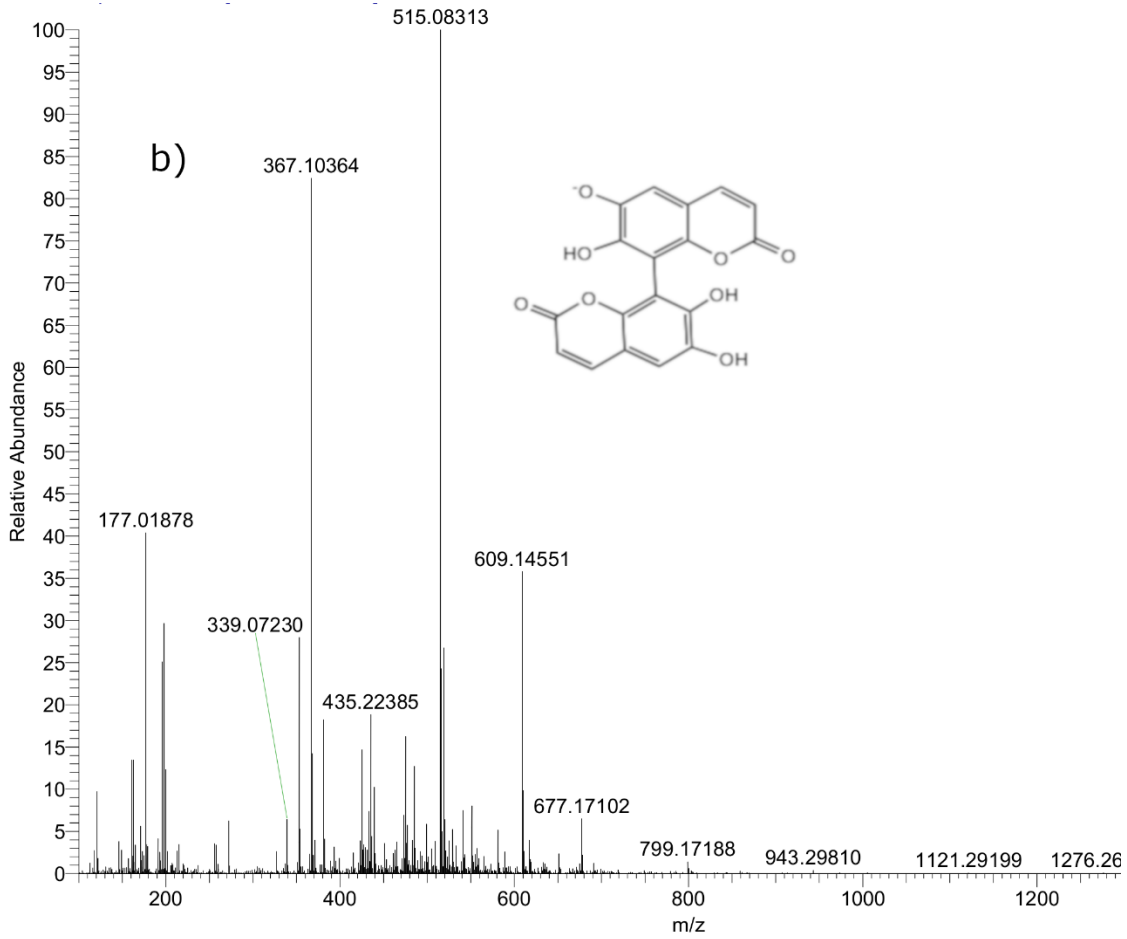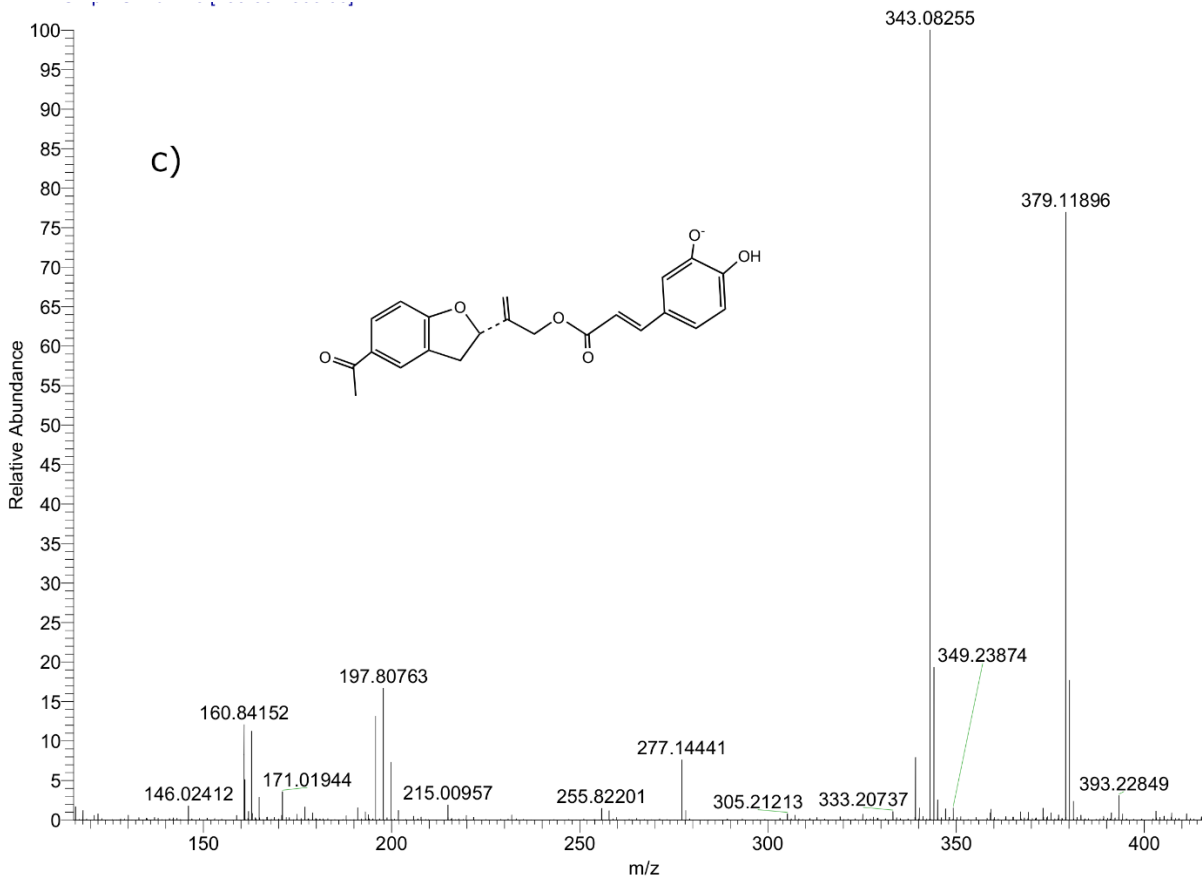

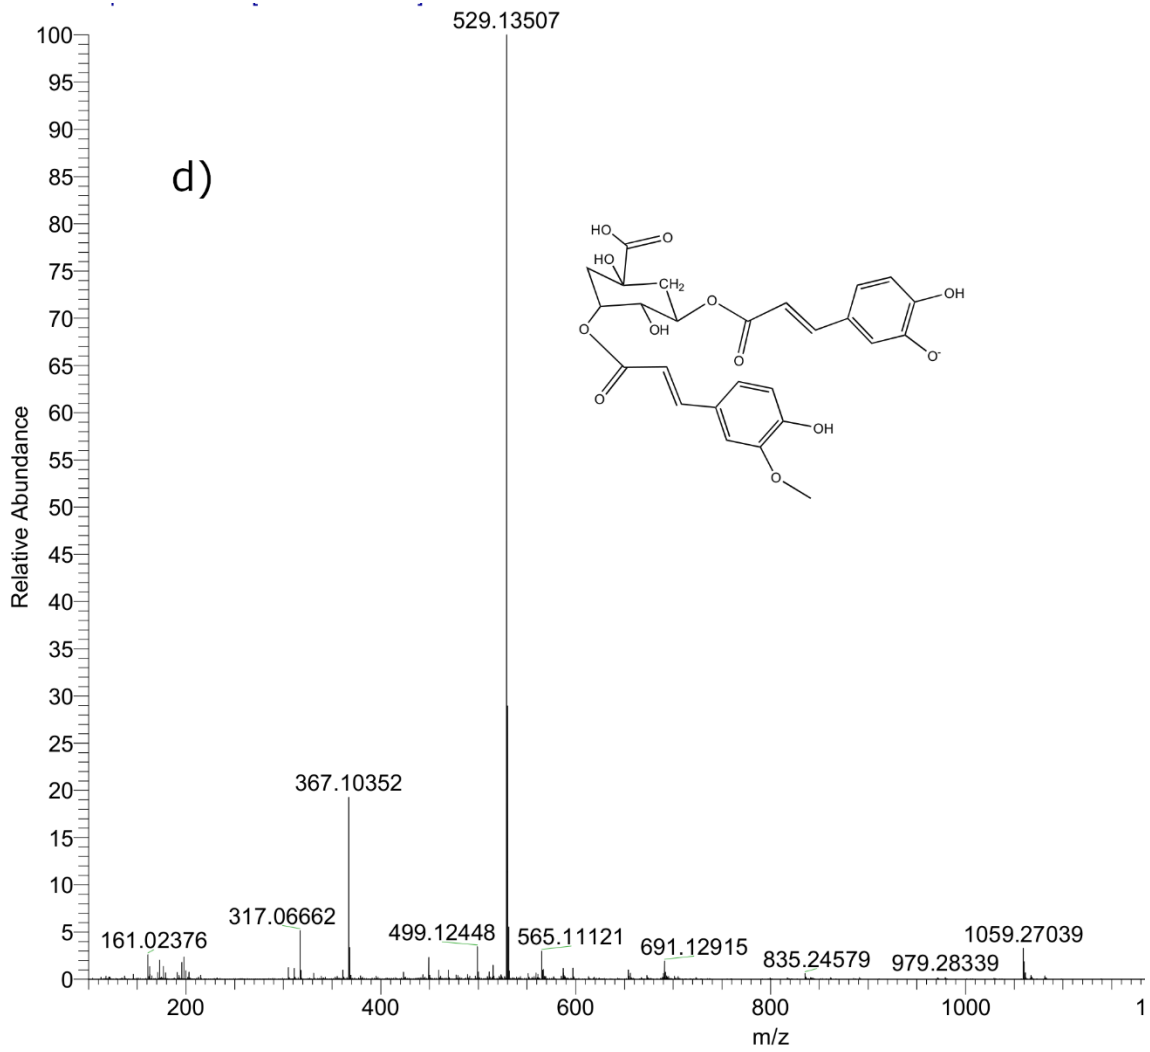

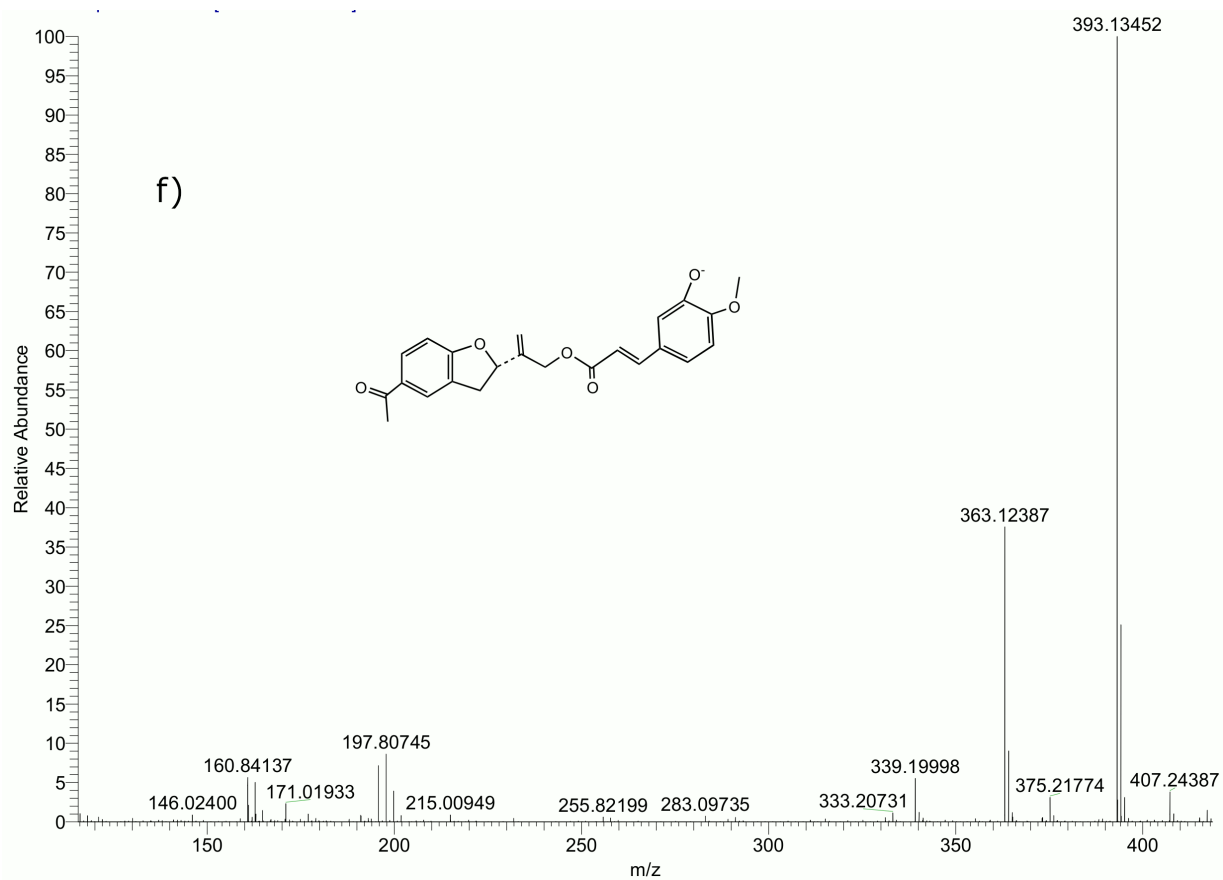

**Figure S1.** Structures and full MS spectra of compounds 5, 8, 9, 16, 36 and 37.
